# Supplementary material
Source: PubMed Central journal article supplement (PMC3010767)
Supplement: supp_cwq155_cwq155supp.pdf [file supp_cwq155_cwq155supp.pdf]

**Supplementary Figure 1. *The restoration of MUC17 protein by the treatment of epigenetic modifying agents.*** PANC1 cells were cultured with the medium containing epigenetic modifying agents for 5 days, respectively. MUC17 expression is determined by immunohistochemistry. Restoration of MUC17 is observed in all cells treated with the drugs.

**Supplementary Figure 2. *MUC17 promoter sequence.*** The human *MUC17* gene promoter sequence, which spans positions -687 to +302 with respect to the transcription start site. The numbers of CpG sites and the transcriptional start site +1 (arrow) are shown.

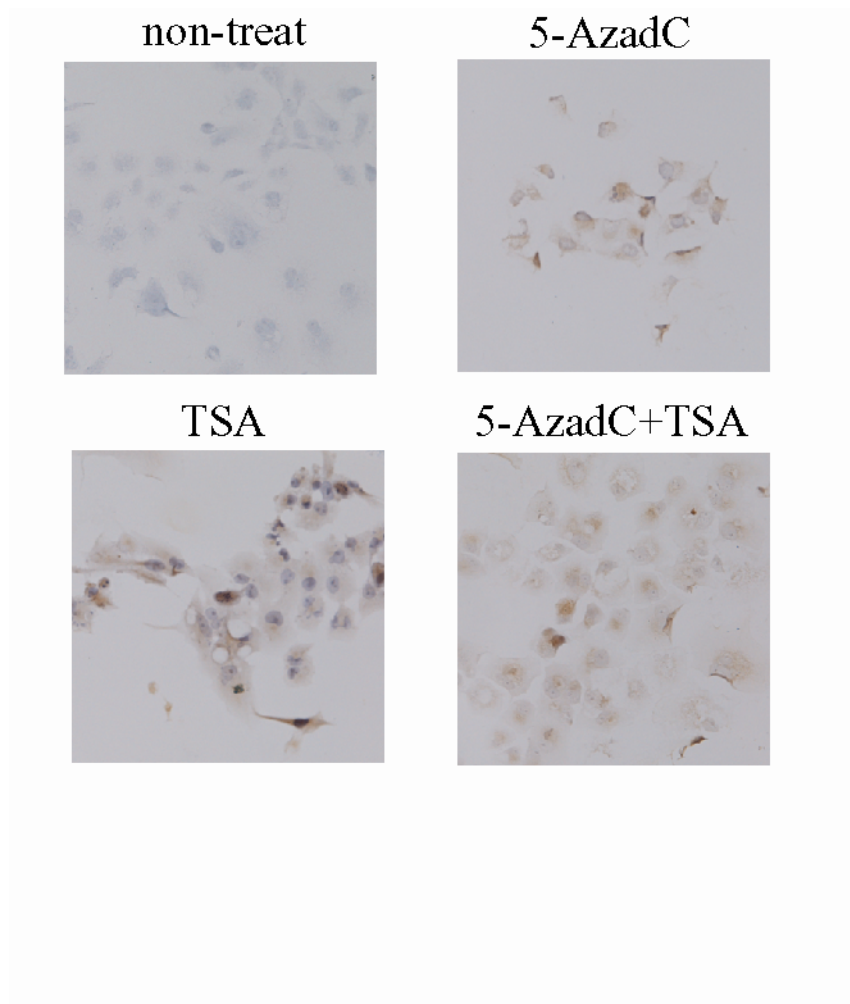

Kitamoto *et al.* Supplementary Figure 1

-687 GAGACAGAGTCTTGCTCTGTTGCCAGGCTGGAGTAC**CG**GAGGCA**CG**ATCTTGGCTCTCTGCAACCTC**CG**CCTCCCAGGTT  
 -607 CAAG**CG**ATTCTCCTGCCTCAGCCTCCTGAGTAGCTGGGATTACAGG**CG**CC**CG**CCACCAAGTCTGGCTGATTTTGTATTT  
 -527 TTAGTAGAGATGGTGTTCATCATGTTGGCCAGGTTGGTCTCAAACCTCCTCATCTCAAGTGATCTTCC**CGCG**TCAGCCTC  
 -447 CCAAAGTGCTGGGATTACAGGTGTGAGCCACCATAACC**CG**GCCAATAAGAAGGGTTAGAAAAGAGACAAAGGGGGTGTCCC  
 -367 TGCTAGGGGTTAGGGTCAAATGCAGGTGGTACCCTCCTCCTTTCCAGCTCAGGCCAGTCCCTCTTGCCCATCTCCCAC  
 -287 CACCCT**CG**GT**CG**GGGGATCTCATCAGTTCCCCCTGGCTCCTACAGGCCCTCTGGGCTGCCCTCTGTTGGGGTGATAAA  
 -207 GCTGATAACCCTCATGCCTATGGGCTGCC**CG**GGCCAGGGAGAGGCACCCCTCCCTCTGCCCTTTGGCTGAAACAGGCC  
 -127 TG**CG**CCCCAAGTCATGAGGAAGCTTCCAGACTGACTCAGGCTCAGGCTGGCCCTGATCCCAGTGTCTCAGGGACCAA  
 -47 AGGTCTCTGGCACCCATTTATTTATCAGTTTCCTTCTCTGAGGCTCATTT**CG**CCAGCTCCTCTGGGGTGACAGGCAAGT  
 +34 GAGA**CG**TGCTCAGAGCTC**CG**ATGCCAAGGCCAGGGACCATGG**CG**CTGTGTCTGCTGACCTTGGTCCTCT**CG**CTCTTGCCC  
 +114 CCACAAGCTGCTGCAGAACAGGGTGAGTGACCCCCA**CG**CC**CG**CTGCCCAAGAGGCCCCATCCCAGGGGCCAGCCTGTCT  
 +194 CTGTCTGCCCATCCC**CG**AGGGAGAGCTGCCTCCAGGACACCAATAGGGGTGTGCCCTCTGCCTGGAGCTCAGCCCTGTGC  
 +274 CTACCCCTGGACTTCTCTTCTCTCCCCA

Kitamoto *et al.* Supplementary Figure 2
